# Supplementary material for: Electrical field facilitates selective transport of CO2 through a laminated MoS2 supported ionic liquid membrane
Source: Royal Society of Chemistry journal article supplement (doi:10.1039/c9ta01636h), 2019-01-01
Supplement: c9ta01636h1.pdf [file c9ta01636h1.pdf]

### Supplementary Figures and Tables

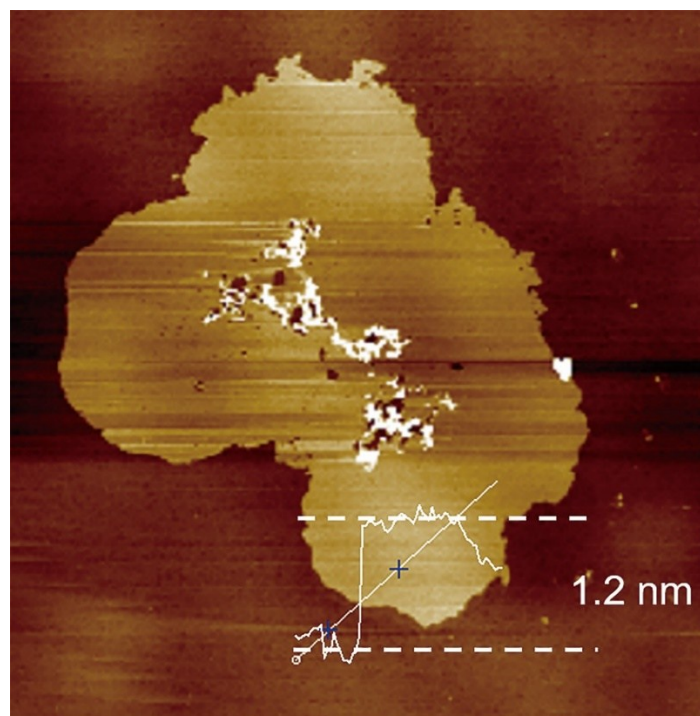

**Figure S1** The AFM image of MoS<sub>2</sub> single layer.

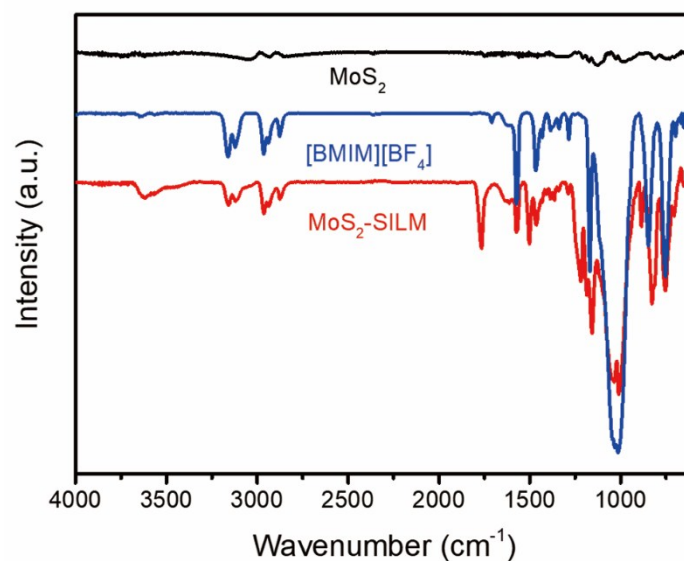

**Figure S2** The FTIR spectra of MoS<sub>2</sub>, [BMIM][BF<sub>4</sub>] and MoS<sub>2</sub>-SILM. Detail data are shown in Table S1.

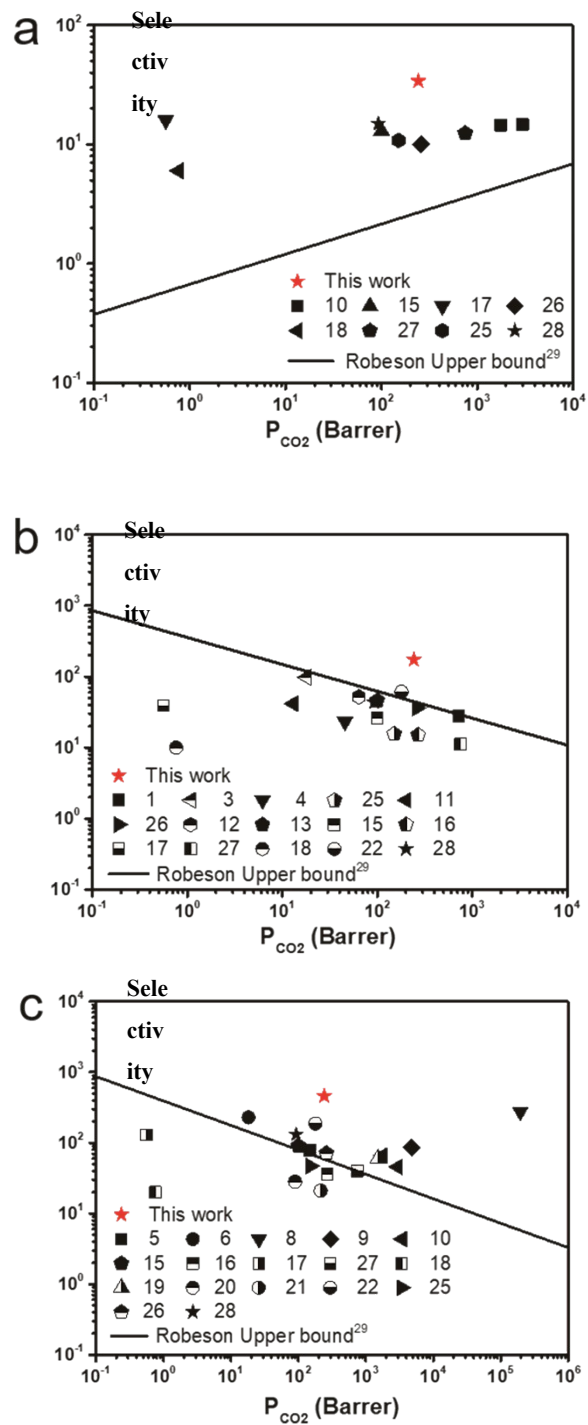

**Figure S3** The separation performance (selectivity vs. permeability) of MoS<sub>2</sub>-SILM under EEF compared with other membranes. (a) CO<sub>2</sub>/H<sub>2</sub>, (b) CO<sub>2</sub>/CH<sub>4</sub> and (c) CO<sub>2</sub>/N<sub>2</sub>. The detail data is shown in Table S2 and from the Supplementary references.

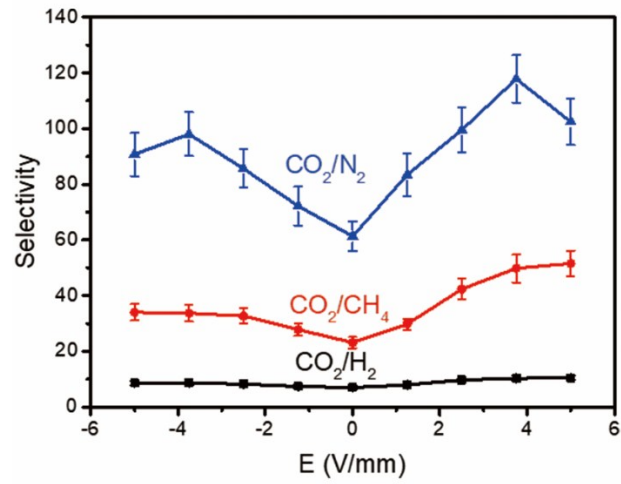

**Figure S4** The mixed gas selectivity of MoS<sub>2</sub>-SILM under EEF.

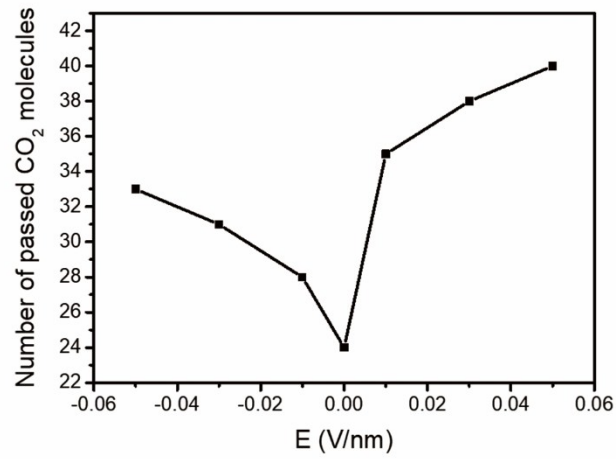

**Figure S5** Molecular simulated CO<sub>2</sub> permeance under EEF.

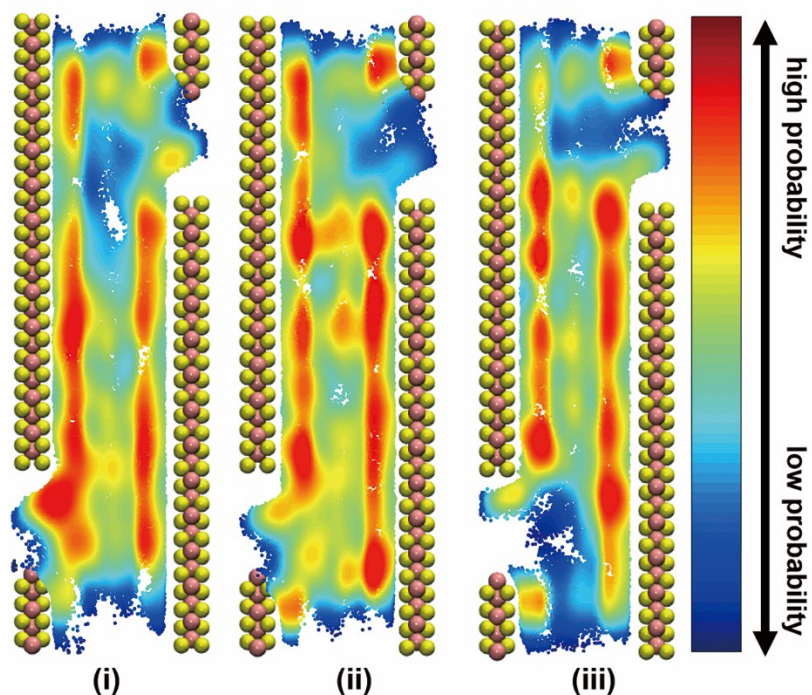

**Figure S6** The density map of [BMIM]<sup>+</sup> inside the nanochannel under EEF of (i)  $E = -0.03$  V/nm, (ii)  $E = 0$  V/nm, (iii)  $E = 0.03$  V/nm. Blue indicates the region that low probability to find [BMIM]<sup>+</sup>, while red region indicates the high probability of finding [BMIM]<sup>+</sup>.

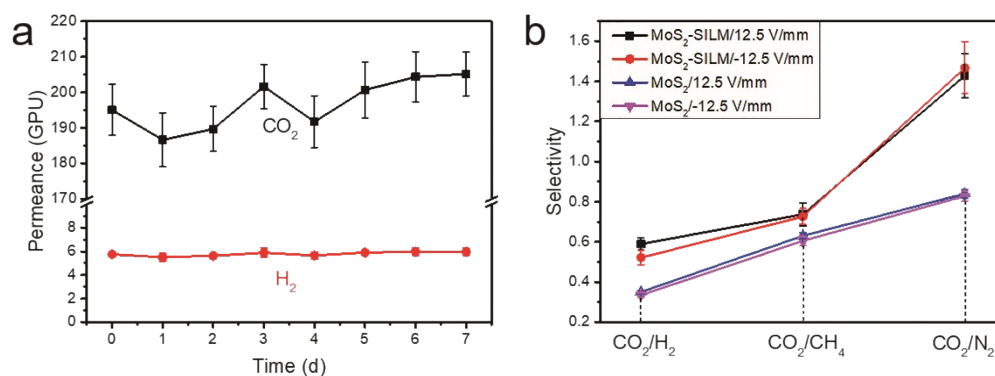

**Figure S7** The durability of MoS<sub>2</sub>-SILM. (a) is the permeance of CO<sub>2</sub> and H<sub>2</sub> tested under 3.75 V/mm for a week; (b) is the gas selectivity of MoS<sub>2</sub>-SILM and MoS<sub>2</sub> under 12.5 V/mm and -12.5 V/mm after 1 day.

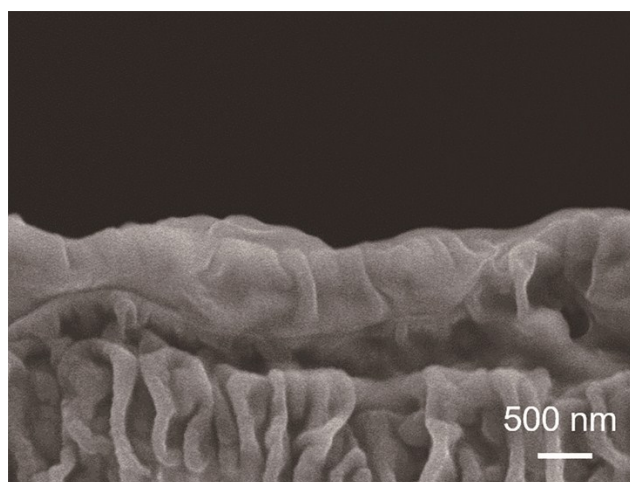

**Figure S8** Cross-section SEM image of MoS<sub>2</sub>-SILM after testing under 12.5 and -12.5 V/mm.

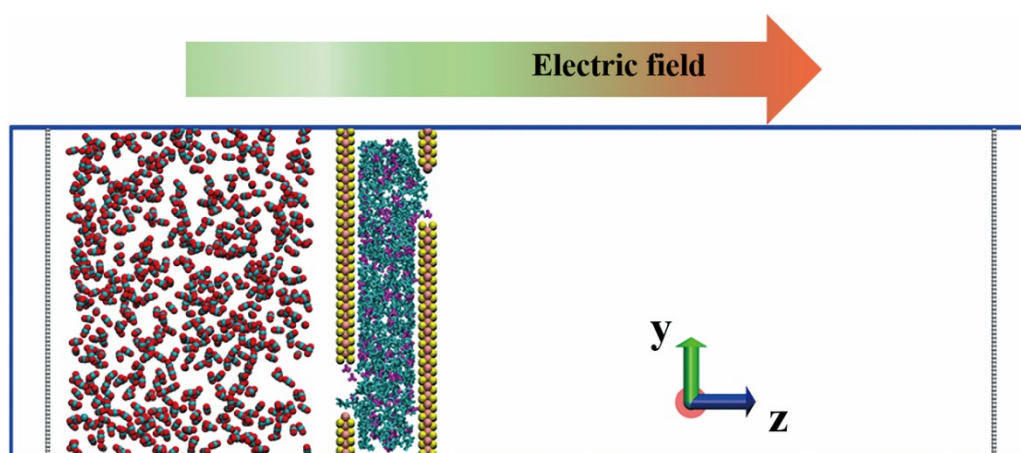

**Fig. S9** A bichamber system for simulations of CO<sub>2</sub> permeance through the MoS<sub>2</sub>-SILM. White, cyan, and red balls denote helium, carbon, and oxygen, respectively. Green-cyan and magenta stick represent [BMIM]<sup>+</sup> and [BF<sub>4</sub>]<sup>-</sup> ions.

**Table S1 The data of FTIR peaks in Fig. S2.**

| <b>[BMIM][BF<sub>4</sub>] (cm<sup>-1</sup>)</b> | <b>MoS<sub>2</sub>-SILM (cm<sup>-1</sup>)</b> | <b>Shifts (cm<sup>-1</sup>)</b> | <b>Assignment</b>         |
|-------------------------------------------------|-----------------------------------------------|---------------------------------|---------------------------|
| 3160.81                                         | 3158.88                                       | -1.93                           | vC4-H, vC5-H              |
| 3122.24                                         | 3118.38                                       | -3.86                           | vC2-H                     |
| 2939.03                                         | 2937.10                                       | -1.93                           | vCH <sub>2</sub>          |
| 2877.32                                         | 2875.39                                       | -1.93                           | vCH <sub>2</sub>          |
| 1708.65                                         | 1764.57                                       | 55.92                           |                           |
| 1621.86                                         | 1614.15                                       | -7.71                           |                           |
| 1465.66                                         | 1463.73                                       | -1.93                           | vCH <sub>3</sub>          |
| 1384.66                                         | 1386.59                                       | 1.93                            | wCH <sub>2</sub>          |
| 1373.09                                         | 1363.45                                       | -9.64                           | vC2N1C5, wCH <sub>2</sub> |
| 1338.38                                         | 1340.31                                       | 1.93                            | vN-Bu, N-Me               |
| 1284.38                                         | 1288.24                                       | 3.86                            | vBF <sub>4</sub>          |
| 1253.52                                         |                                               |                                 | tCH <sub>2</sub> , rC2-H  |
|                                                 | 1218.81                                       |                                 | vBF <sub>4</sub>          |
| 1168.67                                         | 1157.10                                       | -11.57                          | vN-Bu, N-Me               |
| 1031.74                                         | 1035.60                                       | 3.86                            | vBF                       |
| 1014.39                                         | 1010.53                                       | -3.86                           | vBF <sub>4</sub>          |
| 908.32                                          | 919.89                                        | 11.57                           |                           |
| 846.61                                          | 827.32                                        | -19.29                          | rC4-H, rC5-H              |
| 808.04                                          | 813.82                                        | 5.78                            | vC-C-C                    |
| 696.19                                          | 705.83                                        | 9.64                            | vN-Bu, N-Me               |

**Table S2 The data of gas separation performance of different membranes in Figure 3.**

| Number | Membrane                                                      | $P_{CO_2}$<br>(Barrer) | $P_{CO_2}$<br>(GPU) | $CO_2/H_2$ | $CO_2/CH_4$ | $CO_2/N_2$ | Ref          |
|--------|---------------------------------------------------------------|------------------------|---------------------|------------|-------------|------------|--------------|
| 1      | ZIF-90/6FDADAM                                                | 720                    | 12                  |            | 28          |            | 1            |
| 2      | PSF                                                           | -                      | 19.86               |            | 23.12       |            | 2            |
| 3      | DDR                                                           | 17.9                   | 35.8                |            | 98          |            | 3            |
| 4      | MIL-53-NH2/organosilica                                       | 45.6                   | 430                 |            | 23.2        |            | 4            |
| 5      | MMP-3/mPSf                                                    | 150                    | 3000                |            |             | 78         | 5            |
| 6      | PAMAM dendrimer                                               | 18.3                   | 61                  |            |             | 230        | 6            |
| 7      | DNMDAm–DGBAmE–<br>TMC/PDMS/PS                                 | -                      | 1601                |            |             | 138        | 7            |
| 8      | PVAm–PIP/PS                                                   | 195000                 | 6500                |            |             | 277        | 8            |
| 9      | DAmBS–DGBAmE–<br>TMC/PDMS/PS                                  | 4781                   | 5831                |            |             | 86         | 9            |
| 10     | SIPN:PEGMEA:PEGDA:PE<br>GDME                                  | 2980                   | 11.9-14.9           | 14.7       |             | 45.7       | 10           |
| 10     | SIPN:PEGDA:PEGDME                                             | 1767                   | 7.1-8.8             | 14.5       |             | 65.9       | 10           |
| 11     | Matrimid® ZIF-8                                               | 12.96                  | 180                 |            | 41.5        |            | 11           |
| 12     | 6FDA-DAT/Ni2(dodbc)                                           | 63.9                   | 0.91-1.6            |            | 52          |            | 12           |
| 13     | 6FDA-ODA UiO-66                                               | 100                    | 1.26-2.52           |            | 46.1        |            | 13           |
| 14     | Pebax/[emim][BF4]/GO                                          | -                      | 981                 |            |             | 44         | 14           |
| 15     | Pebax/GO                                                      | 100                    | 20                  | 13         | 26          | 91         | 15           |
| 16     | Pebax/[emim][BF4]                                             | 269                    | 306                 |            | 15          | 36         | 16           |
| 17     | PAN/[emim][Ac]GO/PTMSP                                        | 0.56                   | 37                  | 16         | 39          | 130        | 17           |
| 18     | GO                                                            | 0.76                   | 110                 | 6          | 10          | 20         | 18           |
| 19     | 0.1water-[BMIM][BF <sub>4</sub> ]-PES                         | 1518                   | 13.8                |            |             | 60         | 19           |
| 20     | [BMIM][BF <sub>4</sub> ]/AgO                                  | 89.7                   | 14.1                |            | -           | 28.2       | 20           |
| 21     | [BMIM][BF <sub>4</sub> ]/CuO                                  | 214.84                 | 52.4                |            | -           | 21         | 21           |
| 22     | Pebax/0.5%Ag/50%[BMIM][<br>BF <sub>4</sub> ]                  | 180                    | 3.2                 |            | 61          | 187.5      | 22           |
| 23     | [BMIM][BF <sub>4</sub> ]/LiBF <sub>4</sub>                    | -                      | 13.36               |            | 8.25        | 8.4        | 23           |
| 24     | [BMIM][BF <sub>4</sub> ]/cyanuric<br>chloride                 | -                      | 19.2                |            | 10.7        | 11         | 24           |
| 25     | Pebax®/PEG                                                    | 151                    | 2.52                | 10.8       | 15.5        | 47         | 25           |
| 26     | IL-Pebax 165/ZIF-8                                            | 261                    | 20                  | 10         | 36          | 71         | 26           |
| 27     | PEO-PBT/PEG-DBE (PAN-<br>PDMS)                                | 750                    | 15                  | 12.4       | 11.2        | 40         | 27           |
| 28     | MoS2-[BMIM][BF <sub>4</sub> ] (1940<br>nm)                    | 92.9                   | 47.88               | 14.95      | 43.52       | 131.42     | 28           |
| 29     | MoS2-[BMIM][BF <sub>4</sub> ] (1120<br>nm) under positive EEF | 243                    | 195                 | 34         | 174         | 462        | This<br>work |

**Table S3 Lennard-Jones parameters and atom charge of MoS<sub>2</sub> used in this work.<sup>30,31</sup>**

|                       | CO <sub>2</sub> |         | MoS <sub>2</sub> |         |
|-----------------------|-----------------|---------|------------------|---------|
|                       | C               | O       | Mo               | S       |
| $\epsilon$ (Kcal/mol) | 0.0559          | 0.1600  | 0.0135           | 0.4612  |
| $\sigma$ (Å)          | 2.7570          | 2.5650  | 4.2000           | 3.1300  |
| q (e)                 | 0.6512          | -0.3256 | 0.7600           | -0.3800 |

## References

- 1 T. H. Bae, J. S. Lee, W. Qiu, W. J. Koros, C. W. Jones and S. Nair, *Angew. Chem. Int. Ed.*, 2010, **49**, 9863-9866.
- 2 A. K. Zulfhairun and A. F. Ismail, *J. Membr. Sci.*, 2014, **468**, 20-30.
- 3 S. Himeno, T. Tomita, K. Suzuki, K. Nakayama, K. Yajima and S. Yoshida, *Ind. Eng. Chem. Res.*, 2007, **46**, 6989-6997.
- 4 C. Kong, H. Du, L. Chen and B. Chen, *Energy Environ. Sci.*, 2017, **10**, 1812-1819.
- 5 Z. Qiao, S. Zhao, M. Sheng, J. Wang, S. Wang, Z. Wang, C. Zhong and M. D. Guiver, *Nat. Mater.*, 2019, **18**, 163-168.
- 6 S. Duan, T. Kouketsu, S. Kazama and K. Yamada, *J. Membr. Sci.*, 2006, **283**, 2-6.
- 7 S. Li, Z. Wang, X. Yu, J. Wang and S. Wang, *Adv. Mater.*, 2012, **24**, 3196-3200.
- 8 Z. Qiao, Z. Wang, C. Zhang, S. Yuan, Y. Zhu, J. Wang and S. Wang, *AIChE J.*, 2013, **59**, 215-228.
- 9 M. Wang, Z. Wang, S. Li, C. Zhang, J. Wang and S. Wang, *Energy Environ. Sci.*, 2013, **6**, 539-551.
- 10 X. Jiang, S. Li and L. Shao, *Energy Environ. Sci.*, 2017, **10**, 1339-1344.
- 11 Q. Song, S. K. Nataraj, M. V. Roussanova, J. C. Tan, D. J. Hughes, W. Li, P. Bourgoïn, M. A. Alam, A. K. Cheetham, S. A. Al-Muhtaseb and E. Sivaniah, *Energy Environ. Sci.*, 2012, **5**, 8359-8369.
- 12 J. E. Bachman and J. R. Long, *Energy Environ. Sci.*, 2016, **9**, 2031-2036.
- 13 O. G. Nik, X. Y. Chen and S. Kaliaguine, *J. Membr. Sci.*, 2012, **413**, 48-61.
- 14 W. Fam, J. Mansouri, H. Li, J. Hou and V. Chen, *ACS Appl. Mater. Interfaces*, 2018, **10**, 7389-7400.
- 15 J. Shen, G. Liu, K. Huang, W. Jin, K. R. Lee and N. Xu, *Angew. Chem. Int. Ed.*, 2015, **54**, 578-582.
- 16 W. Fam, J. Mansouri, H. Li and V. Chen, *J. Membr. Sci.*, 2017, **537**, 54-68.
- 17 M. Karunakaran, L. F. Villalobos, M. Kumar, R. Shevate, F. H. Akhtar and K. V. Peinemann, *J. Mater. Chem. A*, 2017, **5**, 649-656.
- 18 H. W. Kim, H. W. Yoon, S. M. Yoon, B. M. Yoo, B. K. Ahn, Y. H. Cho, H. J. Shin, H. Yang, U. Paik and S. Kwon, *Science*, 2013, **342**, 91-95.
- 19 W. Zhao, G. He, L. Zhang, J. Ju, H. Dou, F. Nie, C. Li and H. Liu, *J. Membr. Sci.*, 2010, **350**, 279-285.
- 20 D. Ji, Y. S. Kang and S. W. Kang, *Sci. Rep.*, 2015, **5**, 16362.
- 21 Y. S. Park, C. Ha and S. W. Kang, *RSC Adv.*, 2017, **7**, 33568-33571.



- 22 E. Ghasemi Estahbanati, M. Omidkhah and A. Ebadi Amooghin, *ACS Appl. Mater. Interfaces*, 2017, **9**, 10094-10105.
- 23 Y. Choi, G. H. Hong and S. W. Kang, *J. Nanosci. Nanotechno.*, 2016, **16**, 2832-2835.
- 24 G. H. Hong, D. Ji and S. W. Kang, *RSC Adv.*, 2014, **4**, 16917.
- 25 A. Car, C. Stropnik, W. Yave and K.-V. Peinemann, *J. Membr. Sci.*, 2008, **307**, 88-95.
- 26 A. Jomekian, B. Bazooyar, R. M. Behbahani, T. Mohammadi and A. Kargari, *J. Membr. Sci.*, 2017, **524**, 652-662.
- 27 W. Yave, A. Car, S. S. Funari, S. P. Nunes and K.-V. Peinemann, *Macromolecules*, 2010, **43**, 326-333.
- 28 D. Chen, W. Ying, Y. Guo, Y. Ying and X. Peng, *ACS Appl. Mater. Interfaces*, 2017, **9**, 44251-44257.
- 29 L. M. Robeson, *J. Membr. Sci.*, 2008, 320, 390-400.
- 30 D. Chen, W. Wang, W. Ying, Y. Guo, D. Meng, Y. Yan, R. Yan and X. Peng, *J. Mater. Chem. A*, 2018, **6**, 16566-16573.
- 31 T. Liang, S. R. Phillpot and S. B. Sinnott, *Phys. Rev. B*, 2009, **79**.
